# Supplementary material for: Microbial Community Analysis in the Roots of Aquatic Plants and Isolation of Novel Microbes Including an Organism of the Candidate Phylum OP10
Source: PubMed Central journal article supplement (PMC4036017; doi:10.1264/jsme2.me11288), 2011-12-06
Supplement: 27_149_s1.pdf [file 27_149_s1.pdf]

## Supporting information

**Supplementary Table S1.** Phylogenetic affiliations of 16S rRNA gene clones

| Clone-<br>phylogroup<br>No. <sup>a</sup> | Reed                     |                                    | Japanese loosestrife     |                                    | Pond water               |                                    | Authentic species<br>(Accession No.)                                        | Identity<br>(%) | Phylum<br>(Class)                | Length<br>(bp) |
|------------------------------------------|--------------------------|------------------------------------|--------------------------|------------------------------------|--------------------------|------------------------------------|-----------------------------------------------------------------------------|-----------------|----------------------------------|----------------|
|                                          | Total<br>no. of<br>clone | Name of<br>representative<br>clone | Total<br>no. of<br>clone | Name of<br>representative<br>clone | Total<br>no. of<br>clone | Name of<br>representative<br>clone |                                                                             |                 |                                  |                |
| <u>1</u>                                 | 6                        | CYO-1                              |                          |                                    |                          |                                    | <i>Cellvibrio mixtus</i> subsp. <i>mixtus</i><br>strain ACM 2601 (AF448515) | 94              | <i>Proteobacteria</i><br>(Gamma) | 553            |
| 2                                        | 1                        | CYO-2                              |                          |                                    |                          |                                    | <i>Flavobacterium segetis</i> strain<br>AT1048 <sup>T</sup> (AY581115)      | 96              | <i>Bacteroidetes</i>             | 591            |
| 3                                        | 1                        | CYO-3                              |                          |                                    |                          |                                    | <i>Leptothrix discophora</i> strain SP-6<br>(L33974)                        | 97              | <i>Proteobacteria</i><br>(Beta)  | 646            |
| 4                                        | 2                        | CYO-4                              |                          |                                    | 13                       | CKW-13                             | <i>Limnohabitans curvus</i> strain<br>MWH-C5 (AJ938026)                     | 97              | <i>Proteobacteria</i><br>(Beta)  | 514            |
| 5                                        | 2                        | CYO-5                              |                          |                                    |                          |                                    | <i>Roseateles aquatilis</i> strain<br>CCUG48205 <sup>T</sup> (AM501446)     | 97              | <i>Proteobacteria</i><br>(Beta)  | 568            |
| 6                                        | 1                        | CYO-6                              |                          |                                    |                          |                                    | <i>Aquaspirillum delicatum</i> strain<br>LMG 4328 (AF078756)                | 97              | <i>Proteobacteria</i><br>(Beta)  | 523            |
| 7                                        | 2                        | CYO-7                              |                          |                                    |                          |                                    | <i>Leptothrix cholodnii</i> strain CCM<br>1827 (X97070)                     | 97              | <i>Proteobacteria</i><br>(Beta)  | 620            |
| 8                                        | 1                        | CYO-8                              |                          |                                    |                          |                                    | <i>Aquaspirillum delicatum</i> strain<br>LMG 4328 (AF078756)                | 98              | <i>Proteobacteria</i><br>(Beta)  | 607            |
| 9                                        | 1                        | CYO-9                              |                          |                                    |                          |                                    | <i>Rhodoferrax ferrireducens</i> strain<br>T118 <sup>T</sup> (CP000267)     | 98              | <i>Proteobacteria</i><br>(Beta)  | 579            |
| 10                                       | 4                        | CYO-10                             |                          |                                    |                          |                                    | <i>Azohydromonas lata</i> strain IAM<br>12665 (AB201626)                    | 97              | <i>Proteobacteria</i><br>(Beta)  | 581            |
| 11                                       | 1                        | CYO-11                             |                          |                                    |                          |                                    | <i>Rhodoferrax antarcticus</i> strain<br>Fryx1 (AY609198)                   | 98              | <i>Proteobacteria</i><br>(Beta)  | 567            |
| 12                                       | 1                        | CYO-12                             |                          |                                    | 2                        | CKW-28                             | <i>Aquaspirillum delicatum</i> strain<br>LMG 4328 (AF078756)                | 98              | <i>Proteobacteria</i><br>(Beta)  | 604            |
| <u>13</u>                                | 1                        | CYO-13                             |                          |                                    |                          |                                    | <i>Prostheco bacter debontii</i> strain<br>DSM 14044 (AJ966882)             | 82              | <i>Verrucomicrobia</i>           | 536            |
| 14                                       | 1                        | CYO-14                             |                          |                                    |                          |                                    | <i>Spirochaeta aurantia</i> strain J1<br>(M57740)                           | 97              | <i>Spirochaetes</i>              | 591            |

Supplementary Table S1. (continued)

| Clone-<br>phylogroup<br>No. <sup>a</sup> | Reed                     |                                    | Japanese loosestrife     |                                    | Pond water               |                                    | Authentic species<br>(Accession No.)                                      | Identity<br>(%) | Phylum<br>(Class)                | Length<br>(bp) |
|------------------------------------------|--------------------------|------------------------------------|--------------------------|------------------------------------|--------------------------|------------------------------------|---------------------------------------------------------------------------|-----------------|----------------------------------|----------------|
|                                          | Total<br>no. of<br>clone | Name of<br>representative<br>clone | Total<br>no. of<br>clone | Name of<br>representative<br>clone | Total<br>no. of<br>clone | Name of<br>representative<br>clone |                                                                           |                 |                                  |                |
| 15                                       | 1                        | CYO-15                             |                          |                                    |                          |                                    | <i>Ideonella dechloratans</i> (X72724)                                    | 98              | <i>Proteobacteria</i><br>(Beta)  | 569            |
| 16                                       | 1                        | CYO-17                             |                          |                                    |                          |                                    | <i>Owenweeksia hongkongensis</i> strain<br>UST20020801 (AB125062)         | 88              | <i>Bacteroidetes</i>             | 530            |
| 17                                       | 1                        | CYO-18                             |                          |                                    |                          |                                    | <i>Pedobacter terricola</i> strain DS-45<br>(EF446147)                    | 82              | <i>Bacteroidetes</i>             | 571            |
| 18                                       | 1                        | CYO-19                             |                          |                                    |                          |                                    | <i>Lewinella agarilytica</i> strain SST-19<br>(AM286229)                  | 86              | <i>Bacteroidetes</i>             | 566            |
| 19                                       | 1                        | CYO-20                             |                          |                                    |                          |                                    | <i>Methylobacter tundripaludum</i> strain<br>SV96 <sup>T</sup> (AJ414655) | 91              | <i>Proteobacteria</i><br>(Gamma) | 525            |
| 20                                       | 3                        | CYO-22                             |                          |                                    |                          |                                    | <i>Rhodobacter blasticus</i> strain ATCC<br>33485 <sup>T</sup> (DQ342322) | 98              | <i>Proteobacteria</i><br>(Alpha) | 585            |
| 21                                       | 1                        | CYO-23                             | 2                        | CMI-5                              | 1                        | CKW-12                             | <i>Sediminibacterium salmoneum</i><br>strain NJ-44 (EF407879)             | 97              | <i>Bacteroidetes</i>             | 598            |
| 22                                       | 1                        | CYO-25                             |                          |                                    | 1                        | CKW-25                             | <i>Labrys miyagiensis</i> strain G24116<br>(AB236171)                     | 92              | <i>Proteobacteria</i><br>(Alpha) | 556            |
| 23                                       | 1                        | CYO-26                             |                          |                                    |                          |                                    | <i>Blastochloris sulfoviridis</i> strain<br>DSM729 (D86514)               | 87              | <i>Proteobacteria</i><br>(Alpha) | 357            |
| 24                                       | 1                        | CYO-27                             |                          |                                    |                          |                                    | <i>Asticcacaulis biprosthecium</i> strain<br>DSM 4723 <sup>T</sup>        | 95              | <i>Proteobacteria</i><br>(Alpha) | 306            |
| 25                                       | 1                        | CYO-28                             |                          |                                    |                          |                                    | <i>Azonexus fungiphilus</i> strain BS5-8<br>(AF011350)                    | 97              | <i>Proteobacteria</i><br>(Beta)  | 539            |
| 26                                       | 1                        | CYO-29                             |                          |                                    |                          |                                    | <i>Ehrlichia muris</i> strain AS145<br>(U15527; <i>Proteobacteria</i> )   | 75              | Unclassified                     | 611            |
| 27                                       | 1                        | CYO-30                             |                          |                                    |                          |                                    | <i>Emticicia oligotropha</i> strain<br>GPTSA100-15 (AY904352)             | 94              | <i>Bacteroidetes</i>             | 649            |
| 28                                       | 1                        | CYO-31                             |                          |                                    |                          |                                    | <i>Emticicia oligotropha</i> strain<br>GPTSA100-15 (AY904352)             | 94              | <i>Bacteroidetes</i>             | 519            |
| 29                                       | 1                        | CYO-32                             |                          |                                    |                          |                                    | <i>Ochrobactrum anthropi</i> strain<br>ATCC 49188 (CP000759)              | 90              | <i>Proteobacteria</i><br>(Alpha) | 598            |
| 30                                       | 1                        | CYO-36                             |                          |                                    |                          |                                    | <i>Azospirillum amazonense</i> strain<br>DSM 2787 (Z29616)                | 92              | <i>Proteobacteria</i><br>(Alpha) | 640            |

Supplementary Table S1. (continued)

| Clone-<br>phylogroup<br>No. <sup>a</sup> | Reed                     |                                    | Japanese loosestrife     |                                    | Pond water               |                                    | Authentic species<br>(Accession No.)                                      | Identity<br>(%) | Phylum<br>(Class)                | Length<br>(bp) |
|------------------------------------------|--------------------------|------------------------------------|--------------------------|------------------------------------|--------------------------|------------------------------------|---------------------------------------------------------------------------|-----------------|----------------------------------|----------------|
|                                          | Total<br>no. of<br>clone | Name of<br>representative<br>clone | Total<br>no. of<br>clone | Name of<br>representative<br>clone | Total<br>no. of<br>clone | Name of<br>representative<br>clone |                                                                           |                 |                                  |                |
| 31                                       | 1                        | CYO-37                             |                          |                                    |                          |                                    | <i>Rubrivivax gelatinosus</i> strain<br>ATCC17011 (D16213)                | 98              | <i>Proteobacteria</i><br>(Beta)  | 528            |
| 32                                       | 1                        | CYO-38                             |                          |                                    |                          |                                    | <i>Pseudodevosia insulae</i> strain DS-56<br>(EF012357)                   | 98              | <i>Proteobacteria</i><br>(Alpha) | 556            |
| 33                                       | 1                        | CYO-40                             |                          |                                    |                          |                                    | <i>Sphingomonas xenophaga</i> strain<br>BN6 (X94098)                      | 96              | <i>Proteobacteria</i><br>(Alpha) | 574            |
| 34                                       | 1                        | CYO-41                             |                          |                                    |                          |                                    | <i>Dechloromonas hortensis</i> strain<br>MA-1 (AY277621)                  | 98              | <i>Proteobacteria</i><br>(Beta)  | 574            |
| 35                                       | 1                        | CYO-42                             |                          |                                    |                          |                                    | <i>Persephonella guaymasensis</i> strain<br>H2 (AF385630; Aquificales)    | 76              | Unclassified                     | 568            |
| 36                                       | 4                        | CYO-43                             |                          |                                    |                          |                                    | <i>Fluviicola taffensis</i> strain RW262<br>(AF493694)                    | 94              | <i>Bacteroidetes</i>             | 812            |
| 37                                       | 1                        | CYO-44                             |                          |                                    |                          |                                    | <i>Phenylobacterium koreense</i> strain<br>Slu-01 (AB166881)              | 89              | <i>Proteobacteria</i><br>(Alpha) | 573            |
| 38                                       | 3                        | CYO-45                             |                          |                                    |                          |                                    | <i>Denitratisoma oestradiolicum</i> strain<br>AcBE2-1 (AY879297)          | 95              | <i>Proteobacteria</i><br>(Beta)  | 565            |
| 39                                       | 1                        | CYO-48                             |                          |                                    |                          |                                    | <i>Undibacterium pigrum</i> strain<br>CCUG 49009 (AM397630)               | 98              | <i>Proteobacteria</i><br>(Beta)  | 532            |
| 40                                       | 2                        | CYO-49                             |                          |                                    |                          |                                    | <i>Rubrivivax gelatinosus</i> strain<br>ATCC17011 (D16213)                | 98              | <i>Proteobacteria</i><br>(Beta)  | 533            |
| 41                                       | 1                        | CYO-50                             |                          |                                    |                          |                                    | <i>Methylobacter tundripaludum</i> strain<br>SV96 <sup>T</sup> (AJ414655) | 93              | <i>Proteobacteria</i><br>(Gamma) | 596            |
| 42                                       | 1                        | CYO-51                             |                          |                                    |                          |                                    | <i>Nitrospira moscoviensis</i> (X82558)                                   | 98              | <i>Nitrospirae</i>               | 571            |
| 43                                       | 1                        | CYO-52                             |                          |                                    |                          |                                    | <i>Rhodobium orientis</i> strain MB312<br>(D30792)                        | 87              | <i>Proteobacteria</i><br>(Alpha) | 603            |
| 44                                       | 1                        | CYO-53                             |                          |                                    |                          |                                    | <i>Flexibacter ruber</i> strain IFO 16675<br>(AB078064)                   | 85              | <i>Bacteroidetes</i>             | 620            |
| 45                                       | 1                        | CYO-54                             |                          |                                    |                          |                                    | <i>Bdellovibrio bacteriovorus</i> strain<br>DSM 50705 (AJ278145)          | 92              | <i>Proteobacteria</i><br>(Delta) | 463            |
| 46                                       | 1                        | CYO-55                             |                          |                                    |                          |                                    | <i>Terrimonas lutea</i> strain 14990Y<br>(AB192292)                       | 93              | <i>Bacteroidetes</i>             | 646            |
| 47                                       | 1                        | CYO-56                             |                          |                                    |                          |                                    | <i>Opitutus terrae</i> strain ACB90<br>(AJ229246)                         | 91              | <i>Verrucomicrobia</i>           | 642            |

Supplementary Table S1. (continued)

| Clone-<br>phylogroup<br>No. <sup>a</sup> | Reed                     |                                    | Japanese loosestrife     |                                    | Pond water               |                                    | Authentic species<br>(Accession No.)                                                           | Identity<br>(%) | Phylum<br>(Class)                | Length<br>(bp) |
|------------------------------------------|--------------------------|------------------------------------|--------------------------|------------------------------------|--------------------------|------------------------------------|------------------------------------------------------------------------------------------------|-----------------|----------------------------------|----------------|
|                                          | Total<br>no. of<br>clone | Name of<br>representative<br>clone | Total<br>no. of<br>clone | Name of<br>representative<br>clone | Total<br>no. of<br>clone | Name of<br>representative<br>clone |                                                                                                |                 |                                  |                |
| <u>48</u>                                | 1                        | CYO-57                             |                          |                                    |                          |                                    | <i>Byssophaga cruenta</i> strain DSM<br>14553 <sup>T</sup> (AJ833647)                          | 95              | <i>Proteobacteria</i><br>(Delta) | 646            |
| <u>49</u>                                | 1                        | CYO-58                             |                          |                                    |                          |                                    | <i>Opitutus terrae</i> strain ACB90<br>(AJ229246)                                              | 92              | <i>Verrucomicrobia</i>           | 596            |
| <u>50</u>                                | 1                        | CYO-59                             |                          |                                    |                          |                                    | <i>Thermosulfidibacter takaii</i> strain<br>ABI70S6 (AB282756;<br><i>Aquificales</i> )         | 78              | Candidate phylum<br>GN1          | 619            |
| <u>51</u>                                | 1                        | CYO-60                             |                          |                                    |                          |                                    | <i>Acidithiobacillus ferrooxidans</i><br>strain DSM 2392 (AJ459800)                            | 86              | <i>Proteobacteria</i><br>(Gamma) | 647            |
| <u>52</u>                                | 1                        | CYO-62                             | 1                        | CMI-18                             |                          |                                    | <i>Haliscomenobacter hydrossis</i> strain<br>DSM 1100 (EF554367)                               | 86              | <i>Bacteroidetes</i>             | 620            |
| <u>53</u>                                | 1                        | CYO-63                             |                          |                                    |                          |                                    | <i>Cystobacter violaceus</i> strain Cb<br>vi29 (AJ233905)                                      | 99              | <i>Proteobacteria</i><br>(Delta) | 523            |
| <u>54</u>                                | 1                        | CYO-64                             |                          |                                    |                          |                                    | <i>Opitutus terrae</i> strain ACB90<br>(AJ229246)                                              | 92              | <i>Verrucomicrobia</i>           | 640            |
| <u>55</u>                                | 1                        | CYO-65                             |                          |                                    |                          |                                    | <i>Chondromyces lanuginosus</i> strain<br>Sy t2 (AJ233939)                                     | 91              | <i>Proteobacteria</i><br>(Delta) | 645            |
| <u>56</u>                                | 1                        | CYO-66                             |                          |                                    |                          |                                    | <i>Paracoccus aminovorans</i> strain<br>JCM 7685 (D32240)                                      | 97              | <i>Proteobacteria</i><br>(Alpha) | 610            |
| <u>57</u>                                | 1                        | CYO-68                             |                          |                                    |                          |                                    | <i>Polyangium thaxteri</i> strain Pl t3<br>(AJ233943)                                          | 91              | <i>Proteobacteria</i><br>(Delta) | 814            |
| <u>58</u>                                | 1                        | CYO-69                             |                          |                                    |                          |                                    | <i>Chondromyces apiculatus</i> strain<br>Cm a14 (AJ233938)                                     | 92              | <i>Proteobacteria</i><br>(Delta) | 694            |
| <u>59</u>                                | 1                        | CYO-71                             |                          |                                    |                          |                                    | <i>Dechloromonas hortensis</i> strain<br>MA-1 (AY277621)                                       | 98              | <i>Proteobacteria</i><br>(Beta)  | 804            |
| <u>60</u>                                | 1                        | CYO-73                             |                          |                                    |                          |                                    | <i>Trojanella thessalonices</i> strain L13<br>(AF069496)                                       | 89              | <i>Proteobacteria</i><br>(Alpha) | 799            |
| <u>61</u>                                | 1                        | CYO-74                             |                          |                                    |                          |                                    | <i>Gemmata obscuriglobus</i> strain<br>ACM 2246                                                | 85              | <i>Planctomycetes</i>            | 780            |
| <u>62</u>                                | 1                        | CYO-76                             |                          |                                    |                          |                                    | <i>Curtobacterium ammoniigenes</i><br>strain NBRC 101789 (AB266600;<br><i>Actinobacteria</i> ) | 79              | Candidate phylum<br>OP10         | 807            |

Supplementary Table S1. (continued)

| Clone-<br>phylogroup<br>No. <sup>a</sup> | Reed                     |                                    | Japanese loosestrife     |                                    | Pond water               |                                    | Authentic species<br>(Accession No.)                                              | Identity<br>(%) | Phylum<br>(Class)                | Length<br>(bp) |
|------------------------------------------|--------------------------|------------------------------------|--------------------------|------------------------------------|--------------------------|------------------------------------|-----------------------------------------------------------------------------------|-----------------|----------------------------------|----------------|
|                                          | Total<br>no. of<br>clone | Name of<br>representative<br>clone | Total<br>no. of<br>clone | Name of<br>representative<br>clone | Total<br>no. of<br>clone | Name of<br>representative<br>clone |                                                                                   |                 |                                  |                |
| <u>63</u>                                | 1                        | CYO-77                             |                          |                                    | 8                        | CKW-22                             | <i>Flavobacterium terrae</i> strain R2A1-13 <sup>T</sup> (EF117329)               | 94              | <i>Bacteroidetes</i>             | 640            |
| <u>64</u>                                | 1                        | CYO-78                             |                          |                                    |                          |                                    | <i>Polyangium thaxteri</i> strain Pl t3 (AJ233943)                                | 91              | <i>Proteobacteria</i><br>(Delta) | 735            |
| <u>65</u>                                | 1                        | CYO-79                             |                          |                                    |                          |                                    | <i>Fluviicola taffensis</i> strain RW262 (AF493694)                               | 94              | <i>Proteobacteria</i><br>(Delta) | 803            |
| <u>66</u>                                | 1                        | CYO-80                             |                          |                                    |                          |                                    | <i>Dechloromonas hortensis</i> strain MA-1 (AY277621)                             | 95              | <i>Proteobacteria</i><br>(Beta)  | 817            |
| <u>67</u>                                |                          |                                    | 1                        | CMI-1                              |                          |                                    | <i>Methylophilus methylotrophus</i> strain NCIMB 10515 (AB193724)                 | 95              | <i>Proteobacteria</i><br>(Beta)  | 619            |
| <u>68</u>                                |                          |                                    | 1                        | CMI-2                              |                          |                                    | <i>Methylophilus methylotrophus</i> strain NCIMB 10515 (AB193724)                 | 97              | <i>Proteobacteria</i><br>(Beta)  | 656            |
| <u>69</u>                                |                          |                                    | 1                        | CMI-3                              |                          |                                    | <i>Beijerinckia mobilis</i> strain DSM 2326 (AJ563932)                            | 93              | <i>Proteobacteria</i><br>(Alpha) | 659            |
| <u>70</u>                                |                          |                                    | 2                        | CMI-4                              |                          |                                    | <i>Bacteroides capillosus</i> strain ATCC 29799 (AY136666; <i>Bacteroidetes</i> ) | 84              | Unclassified                     | 625            |
| <u>71</u>                                |                          |                                    | 2                        | CMI-6                              |                          |                                    | <i>Steroidobacter denitrificans</i> strain FS (EF605262)                          | 93              | <i>Proteobacteria</i><br>(Gamma) | 539            |
| <u>72</u>                                |                          |                                    | 1                        | CMI-7                              |                          |                                    | <i>Steroidobacter denitrificans</i> strain FS (EF605262)                          | 94              | <i>Proteobacteria</i><br>(Gamma) | 582            |
| <u>73</u>                                |                          |                                    | 1                        | CMI-8                              |                          |                                    | <i>Clostridium putrefaciens</i> strain DSM 1291 (AF127024; <i>Firmicutes</i> )    | 83              | <i>Acidobacteria</i>             | 640            |
| <u>74</u>                                |                          |                                    | 1                        | CMI-9                              |                          |                                    | <i>Flavisolibacter ginsengisoli</i> strain Gsoil 643 (AB267477)                   | 94              | <i>Bacteroidetes</i>             | 651            |
| <u>75</u>                                |                          |                                    | 1                        | CMI-10                             | 9                        | CKW-3                              | <i>Haematobacter massiliensis</i> strain CCUG 47968 (DQ342309)                    | 98              | <i>Proteobacteria</i><br>(Alpha) | 557            |
| <u>76</u>                                |                          |                                    | 1                        | CMI-11                             |                          |                                    | <i>Steroidobacter denitrificans</i> strain FS (EF605262)                          | 93              | <i>Proteobacteria</i><br>(Gamma) | 600            |
| <u>77</u>                                |                          |                                    | 1                        | CMI-12                             |                          |                                    | <i>Lachnobacterium bovis</i> strain LRC 5436 (AF298665; <i>Firmicutes</i> )       | 80              | <i>Acidobacteria</i>             | 625            |
| <u>78</u>                                |                          |                                    | 2                        | CMI-13                             |                          |                                    | <i>Bacteroides capillosus</i> strain ATCC 29799 (AY136666; <i>Bacteroidetes</i> ) | 84              | Unclassified                     | 640            |

Supplementary Table S1. (continued)

| Clone-<br>phylogroup<br>No. <sup>a</sup> | Reed                     |                                    | Japanese loosestrife     |                                    | Pond water               |                                    | Authentic species<br>(Accession No.)                                                       | Identity<br>(%) | Phylum<br>(Class)                         | Length<br>(bp) |
|------------------------------------------|--------------------------|------------------------------------|--------------------------|------------------------------------|--------------------------|------------------------------------|--------------------------------------------------------------------------------------------|-----------------|-------------------------------------------|----------------|
|                                          | Total<br>no. of<br>clone | Name of<br>representative<br>clone | Total<br>no. of<br>clone | Name of<br>representative<br>clone | Total<br>no. of<br>clone | Name of<br>representative<br>clone |                                                                                            |                 |                                           |                |
| <u>79</u>                                |                          |                                    | 1                        | CMI-14                             |                          |                                    | <i>Haliscomenobacter hydrossis</i> strain<br>DSM 1100 (AJ784892;<br><i>Bacteroidetes</i> ) | 85              | <i>Bacteroidetes</i>                      | 590            |
| <u>80</u>                                |                          |                                    | 2                        | CMI-15                             |                          |                                    | <i>Steroidobacter denitrificans</i> strain<br>FS (EF605262)                                | 92              | <i>Proteobacteria</i><br>( <i>Gamma</i> ) | 556            |
| <u>81</u>                                |                          |                                    | 1                        | CMI-16                             |                          |                                    | <i>Clostridium aminophilum</i> strain F<br>(L04165; <i>Firmicutes</i> )                    | 82              | <i>Acidobacteria</i>                      | 630            |
| <u>82</u>                                |                          |                                    | 2                        | CMI-19                             |                          |                                    | <i>Azohydromonas lata</i> strain IAM<br>12665 (AB201626)                                   | 98              | <i>Proteobacteria</i><br>( <i>Beta</i> )  | 578            |
| <u>83</u>                                |                          |                                    | 1                        | CMI-20                             |                          |                                    | <i>Rhodoferax ferrireducens</i> strain<br>T118 (AF435948)                                  | 98              | <i>Proteobacteria</i><br>( <i>Beta</i> )  | 591            |
| <u>84</u>                                |                          |                                    | 1                        | CMI-21                             |                          |                                    | <i>Clostridium aminophilum</i> strain F<br>(L04165; <i>Firmicutes</i> )                    | 82              | <i>Acidobacteria</i>                      | 520            |
| <u>85</u>                                |                          |                                    | 1                        | CMI-22                             |                          |                                    | <i>Clostridium aminophilum</i> strain F<br>(L04165; <i>Firmicutes</i> )                    | 83              | <i>Acidobacteria</i>                      | 640            |
| <u>86</u>                                |                          |                                    | 1                        | CMI-23                             |                          |                                    | <i>Prostheco bacter debontii</i> strain<br>DSM 14044 (AJ966882)                            | 84              | <i>Verrucomicrobia</i>                    | 633            |
| <u>87</u>                                |                          |                                    | 2                        | CMI-24                             |                          |                                    | <i>Aquincola tertiaricarbonis</i> strain<br>L10 (DQ656489)                                 | 95              | <i>Proteobacteria</i><br>( <i>Beta</i> )  | 653            |
| <u>88</u>                                |                          |                                    | 1                        | CMI-25                             |                          |                                    | <i>Aquaspirillum itersonii</i> subsp.<br><i>nipponicum</i> strain LMG 7370<br>(EF612766)   | 88              | <i>Proteobacteria</i><br>( <i>Alpha</i> ) | 558            |
| <u>89</u>                                |                          |                                    | 1                        | CMI-29                             |                          |                                    | <i>Hyphomicrobium sulfonivorans</i><br>strain ATCC BAA-113<br>(AF235089)                   | 96              | <i>Proteobacteria</i><br>( <i>Alpha</i> ) | 571            |
| <u>90</u>                                |                          |                                    | 1                        | CMI-30                             |                          |                                    | <i>Pelobacter propionicus</i> strain DSM<br>2379 (CP000482)                                | 83              | <i>Proteobacteria</i><br>( <i>Delta</i> ) | 549            |
| <u>91</u>                                |                          |                                    | 1                        | CMI-31                             |                          |                                    | <i>Steroidobacter denitrificans</i> strain<br>FS (EF605262)                                | 93              | <i>Proteobacteria</i><br>( <i>Gamma</i> ) | 646            |
| <u>92</u>                                |                          |                                    | 1                        | CMI-32                             |                          |                                    | <i>Novosphingobium nitrogenifigens</i><br>strain Y88 (DQ448852)                            | 97              | <i>Proteobacteria</i><br>( <i>Alpha</i> ) | 520            |

Supplementary Table S1. (continued)

| Clone-<br>phylogroup<br>No. <sup>a</sup> | Reed                     |                                    | Japanese loosestrife     |                                    | Pond water               |                                    | Authentic species<br>(Accession No.)                                                         | Identity<br>(%) | Phylum<br>(Class)                | Length<br>(bp) |
|------------------------------------------|--------------------------|------------------------------------|--------------------------|------------------------------------|--------------------------|------------------------------------|----------------------------------------------------------------------------------------------|-----------------|----------------------------------|----------------|
|                                          | Total<br>no. of<br>clone | Name of<br>representative<br>clone | Total<br>no. of<br>clone | Name of<br>representative<br>clone | Total<br>no. of<br>clone | Name of<br>representative<br>clone |                                                                                              |                 |                                  |                |
| <u>93</u>                                |                          |                                    | 1                        | CMI-33                             |                          |                                    | <i>Steroidobacter denitrificans</i> strain<br>FS (EF605262)                                  | 93              | <i>Proteobacteria</i><br>(Gamma) | 519            |
| <u>94</u>                                |                          |                                    | 1                        | CMI-34                             |                          |                                    | <i>Planctomyces limnophilus</i> strain<br>IFAM 1008 (X62911)                                 | 92              | <i>Planctomycetes</i>            | 600            |
| <u>95</u>                                |                          |                                    | 2                        | CMI-35                             |                          |                                    | <i>Novosphingobium</i><br><i>pentaromativorans</i> strain US6-1<br>(AF502400)                | 98              | <i>Proteobacteria</i><br>(Alpha) | 580            |
| <u>96</u>                                |                          |                                    | 1                        | CMI-37                             |                          |                                    | <i>Novosphingobium aromaticivorans</i><br>strain DSM 12444 (CP000248)                        | 96              | <i>Proteobacteria</i><br>(Alpha) | 626            |
| <u>97</u>                                |                          |                                    | 1                        | CMI-38                             |                          |                                    | <i>Lewinella agarilytica</i> strain SST-19<br>(AM286229)                                     | 85              | <i>Bacteroidetes</i>             | 649            |
| <u>98</u>                                |                          |                                    | 1                        | CMI-39                             |                          |                                    | <i>Methylophilus leisingeri</i> strain<br>DSM 6813 (AB193725)                                | 95              | <i>Proteobacteria</i><br>(Beta)  | 652            |
| <u>99</u>                                |                          |                                    | 1                        | CMI-40                             |                          |                                    | <i>Methylophilus leisingeri</i> strain<br>DSM 6813 (AB193725)                                | 96              | <i>Proteobacteria</i><br>(Beta)  | 653            |
| <u>100</u>                               |                          |                                    | 1                        | CMI-41                             |                          |                                    | <i>Sporichthya polymorpha</i> strain<br>DSM 46113 (X72377)                                   | 87              | <i>Actinobacteria</i>            | 656            |
| <u>101</u>                               |                          |                                    | 1                        | CMI-42                             |                          |                                    | <i>Pseudomonas fluorescens</i> strain<br>ATCC13525 (DQ207731)                                | 88              | <i>Proteobacteria</i><br>(Gamma) | 657            |
| <u>102</u>                               |                          |                                    | 1                        | CMI-43                             |                          |                                    | <i>Steroidobacter denitrificans</i> strain<br>FS (EF605262)                                  | 88              | <i>Proteobacteria</i><br>(Gamma) | 660            |
| <u>103</u>                               |                          |                                    | 1                        | CMI-44                             |                          |                                    | <i>Methylocella silvestris</i> strain BL2<br>(AJ491847)                                      | 96              | <i>Proteobacteria</i><br>(Alpha) | 514            |
| <u>104</u>                               |                          |                                    | 1                        | CMI-45                             |                          |                                    | <i>Devosia subaequoris</i> strain<br>HST3-14 <sup>T</sup> (AM293857)                         | 92              | <i>Proteobacteria</i><br>(Alpha) | 610            |
| <u>105</u>                               |                          |                                    | 1                        | CMI-47                             |                          |                                    | <i>Streptomyces hiroshimensis</i> strain<br>NBRC 14693 (AB249979;<br><i>Actinobacteria</i> ) | 84              | <i>Acidobacteria</i>             | 608            |
| <u>106</u>                               |                          |                                    | 1                        | CMI-48                             |                          |                                    | <i>Ralstonia insidiosa</i> strain CCUG<br>46388 (AJ539233)                                   | 93              | <i>Proteobacteria</i><br>(Beta)  | 522            |
| <u>107</u>                               |                          |                                    | 1                        | CMI-49                             |                          |                                    | <i>Owenweeksia hongkongensis</i> strain<br>UST20020801 (AB125062)                            | 86              | <i>Bacteroidetes</i>             | 399            |

Supplementary Table S1. (continued)

| Clone-<br>phylogroup<br>No. <sup>a</sup> | Reed                     |                                    | Japanese loosestrife     |                                    | Pond water               |                                    | Authentic species<br>(Accession No.)                                              | Identity<br>(%) | Phylum<br>(Class)                         | Length<br>(bp) |
|------------------------------------------|--------------------------|------------------------------------|--------------------------|------------------------------------|--------------------------|------------------------------------|-----------------------------------------------------------------------------------|-----------------|-------------------------------------------|----------------|
|                                          | Total<br>no. of<br>clone | Name of<br>representative<br>clone | Total<br>no. of<br>clone | Name of<br>representative<br>clone | Total<br>no. of<br>clone | Name of<br>representative<br>clone |                                                                                   |                 |                                           |                |
| <u>108</u>                               |                          |                                    | 1                        | CMI-50                             |                          |                                    | <i>Niastella jeongjuensis</i> strain<br>GR20-13 (DQ244076)                        | 93              | <i>Bacteroidetes</i>                      | 565            |
| <u>109</u>                               |                          |                                    | 1                        | CMI-51                             |                          |                                    | <i>Persephonella guaymasensis</i> strain<br>H2 (AF385630; <i>Aquificales</i> )    | 78              | <i>Planctomycetes</i>                     | 647            |
| <u>110</u>                               |                          |                                    | 1                        | CMI-53                             |                          |                                    | <i>Desulfomonile limimaris</i><br>(AF230531; <i>Proteobacteria</i> )              | 79              | <i>Acidobacteria</i>                      | 532            |
| <u>111</u>                               |                          |                                    | 1                        | CMI-54                             |                          |                                    | <i>Polyangium vitellinum</i> strain P1 vt1<br>(AJ233944)                          | 89              | <i>Proteobacteria</i><br>( <i>Delta</i> ) | 630            |
| <u>112</u>                               |                          |                                    | 2                        | CMI-55                             |                          |                                    | <i>Planctomyces maris</i> strain DSM<br>8797 <sup>T</sup> (AJ231184)              | 85              | <i>Planctomycetes</i>                     | 653            |
| <u>113</u>                               |                          |                                    | 1                        | CMI-56                             |                          |                                    | <i>Devosia subaequoris</i> strain<br>HST3-14 <sup>T</sup> (AM293857)              | 93              | <i>Proteobacteria</i><br>( <i>Alpha</i> ) | 640            |
| <u>114</u>                               |                          |                                    | 2                        | CMI-57                             |                          |                                    | <i>Devosia subaequoris</i> strain<br>HST3-14 <sup>T</sup> (AM293857)              | 93              | <i>Proteobacteria</i><br>( <i>Alpha</i> ) | 599            |
| <u>115</u>                               |                          |                                    | 2                        | CMI-59                             |                          |                                    | <i>Hyphomicrobium zavarzinii</i> strain<br>ZV-622 (Y14305)                        | 93              | <i>Proteobacteria</i><br>( <i>Alpha</i> ) | 598            |
| <u>116</u>                               |                          |                                    | 1                        | CMI-60                             |                          |                                    | <i>Hyphomicrobium vulgare</i> strain<br>ATCC 27500 (Y14302)                       | 94              | <i>Proteobacteria</i><br>( <i>Alpha</i> ) | 547            |
| 117                                      |                          |                                    | 1                        | CMI-61                             |                          |                                    | <i>Methylocapsa acidiphila</i> strain B2 <sup>T</sup><br>(AJ278726)               | 97              | <i>Proteobacteria</i><br>( <i>Alpha</i> ) | 650            |
| <u>118</u>                               |                          |                                    | 1                        | CMI-62                             |                          |                                    | <i>Haliscomenobacter hydrossis</i> strain<br>DSM 1100 (AJ784892)                  | 85              | <i>Bacteroidetes</i>                      | 542            |
| 119                                      |                          |                                    | 1                        | CMI-63                             |                          |                                    | <i>Bradyrhizobium elkanii</i> strain strain<br>USDA 76 (U35000)                   | 100             | <i>Proteobacteria</i><br>( <i>Alpha</i> ) | 567            |
| 120                                      |                          |                                    | 1                        | CMI-64                             |                          |                                    | <i>Porphyrobacter neustonensis</i> strain<br>DSM 9434 <sup>T</sup> (AF465838)     | 98              | <i>Proteobacteria</i><br>( <i>Alpha</i> ) | 429            |
| <u>121</u>                               |                          |                                    | 1                        | CMI-66                             |                          |                                    | <i>Solirubrobacter soli</i> strain Gsoil<br>355 (AB245334)                        | 88              | <i>Actinobacteria</i>                     | 548            |
| 122                                      |                          |                                    | 1                        | CMI-67                             |                          |                                    | <i>Sphingopyxis flavimaris</i> strain<br>SW-151 (AY554010)                        | 96              | <i>Proteobacteria</i><br>( <i>Alpha</i> ) | 632            |
| <u>123</u>                               |                          |                                    | 1                        | CMI-68                             |                          |                                    | <i>Clostridium putrefaciens</i> strain<br>DSM 1291 (AF127024; <i>Firmicutes</i> ) | 83              | <i>Acidobacteria</i>                      | 624            |



Supplementary Table S1. (continued)

| Clone-<br>phylogroup<br>No. <sup>a</sup> | Reed                     |                                    | Japanese loosestrife     |                                    | Pond water               |                                    | Authentic species<br>(Accession No.)                                                       | Identity<br>(%) | Phylum<br>(Class)                | Length<br>(bp) |
|------------------------------------------|--------------------------|------------------------------------|--------------------------|------------------------------------|--------------------------|------------------------------------|--------------------------------------------------------------------------------------------|-----------------|----------------------------------|----------------|
|                                          | Total<br>no. of<br>clone | Name of<br>representative<br>clone | Total<br>no. of<br>clone | Name of<br>representative<br>clone | Total<br>no. of<br>clone | Name of<br>representative<br>clone |                                                                                            |                 |                                  |                |
| <u>124</u>                               |                          |                                    | 1                        | CMI-69                             |                          |                                    | <i>Steroidobacter denitrificans</i> strain<br>FS (EF605262)                                | 94              | <i>Proteobacteria</i><br>(Gamma) | 540            |
| <u>125</u>                               |                          |                                    | 1                        | CMI-70                             |                          |                                    | <i>Phenylobacterium koreense</i> strain<br>Slu-01 (AB166881)                               | 98              | <i>Proteobacteria</i><br>(Alpha) | 648            |
| <u>126</u>                               |                          |                                    | 1                        | CMI-71                             |                          |                                    | <i>Rhodobacter sphaeroides</i> strain<br>ATCC 17023 <sup>T</sup> (DQ342321)                | 97              | <i>Proteobacteria</i><br>(Alpha) | 576            |
| <u>127</u>                               |                          |                                    | 1                        | CMI-72                             |                          |                                    | <i>Hespellia porcina</i> strain PPC80<br>(AF445239; <i>Firmicutes</i> )                    | 82              | Candidate phylum<br>OP10         | 572            |
| <u>128</u>                               |                          |                                    | 1                        | CMI-73                             |                          |                                    | <i>Desulfonatronum cooperativum</i><br>strain Z-7999 (AY725424;<br><i>Proteobacteria</i> ) | 82              | <i>Acidobacteria</i>             | 592            |
| <u>129</u>                               |                          |                                    | 1                        | CMI-74                             |                          |                                    | <i>Planctomyces brasiliensis</i> strain<br>DSM 5305 <sup>T</sup> (AJ231190)                | 85              | <i>Planctomycetes</i>            | 558            |
| <u>130</u>                               |                          |                                    | 1                        | CMI-75                             |                          |                                    | <i>Flavobacterium ferrugineum</i> strain<br>DSM 30193 <sup>T</sup> (AM230484)              | 94              | <i>Bacteroidetes</i>             | 609            |
| <u>131</u>                               |                          |                                    | 1                        | CMI-77                             |                          |                                    | <i>Desulfovibrio intestinalis</i> strain<br>KMS2 (Y12254; <i>Proteobacteria</i> )          | 78              | Unclassified                     | 524            |
| <u>132</u>                               |                          |                                    | 1                        | CMI-78                             |                          |                                    | <i>Spirulina laxissima</i> strain SAG<br>B256.80 (Y18798; <i>Cyanobacteria</i> )           | 74              | <i>Planctomycetes</i>            | 604            |
| <u>133</u>                               |                          |                                    | 1                        | CMI-79                             |                          |                                    | <i>Pirellula staleyi</i> strain ATCC<br>35122 (AF399914)                                   | 87              | <i>Planctomycetes</i>            | 638            |
| <u>134</u>                               |                          |                                    | 1                        | CMI-80                             |                          |                                    | <i>Geopsychrobacter electrophilus</i><br>strain A2 (AY187304;<br><i>Proteobacteria</i> )   | 82              | Unclassified                     | 545            |
| <u>135</u>                               |                          |                                    | 1                        | CMI-81                             |                          |                                    | <i>Flavisolibacter ginsengisoli</i> strain<br>Gsoil 643 (AB267477)                         | 94              | <i>Bacteroidetes</i>             | 631            |
| <u>136</u>                               |                          |                                    | 1                        | CMI-82                             |                          |                                    | <i>Hyphomicrobium zavarzinii</i> strain<br>ZV-622 (Y14305)                                 | 88              | <i>Proteobacteria</i><br>(Alpha) | 666            |
| <u>137</u>                               |                          |                                    | 1                        | CMI-83                             |                          |                                    | <i>Nitrincola lacisaponensis</i> strain<br>4CA (AY567473)                                  | 86              | <i>Proteobacteria</i><br>(Gamma) | 649            |
| <u>138</u>                               |                          |                                    | 1                        | CMI-85                             |                          |                                    | <i>Sorangium cellulosum</i> strain<br>DSM14627 (EU240497)                                  | 85              | <i>Proteobacteria</i><br>(Delta) | 797            |

Supplementary Table S1. (continued)

| Clone-<br>phylogroup<br>No. <sup>a</sup> | Reed                     |                                    | Japanese loosestrife     |                                    | Pond water               |                                    | Authentic species<br>(Accession No.)                               | Identity<br>(%) | Phylum<br>(Class)               | Length<br>(bp) |
|------------------------------------------|--------------------------|------------------------------------|--------------------------|------------------------------------|--------------------------|------------------------------------|--------------------------------------------------------------------|-----------------|---------------------------------|----------------|
|                                          | Total<br>no. of<br>clone | Name of<br>representative<br>clone | Total<br>no. of<br>clone | Name of<br>representative<br>clone | Total<br>no. of<br>clone | Name of<br>representative<br>clone |                                                                    |                 |                                 |                |
| 139                                      |                          |                                    |                          |                                    | 1                        | CKW-1                              | <i>Polynucleobacter necessarius</i> strain<br>STIR1 (CP001010)     | 99              | <i>Proteobacteria</i><br>(Beta) | 462            |
| 140                                      |                          |                                    |                          |                                    | 1                        | CKW-2                              | <i>Aquaspirillum delicatum</i> strain<br>LMG 4328 (AF078756)       | 96              | <i>Proteobacteria</i><br>(Beta) | 580            |
| 141                                      |                          |                                    |                          |                                    | 2                        | CKW-3                              | <i>Streptacidiphilus jiangxiensis</i> strain<br>22202 (AY389139)   | 91              | <i>Actinobacteria</i>           | 580            |
| 142                                      |                          |                                    |                          |                                    | 1                        | CKW-4                              | <i>Leifsonia poae</i> strain DSM 15202<br>(AM410682)               | 95              | <i>Actinobacteria</i>           | 438            |
| 143                                      |                          |                                    |                          |                                    | 1                        | CKW-5                              | <i>Leifsonia aquatica</i> strain JCM 1368<br>(D45057)              | 95              | <i>Actinobacteria</i>           | 567            |
| 144                                      |                          |                                    |                          |                                    | 3                        | CKW-6                              | <i>Aquaspirillum delicatum</i> strain<br>LMG 4328 (AF078756)       | 97              | <i>Proteobacteria</i><br>(Beta) | 534            |
| 145                                      |                          |                                    |                          |                                    | 1                        | CKW-7                              | <i>Aquaspirillum delicatum</i> strain<br>LMG 4328 (AF078756)       | 96              | <i>Proteobacteria</i><br>(Beta) | 574            |
| 146                                      |                          |                                    |                          |                                    | 1                        | CKW-8                              | <i>Acidovorax facilis</i> strain LMG 2193<br>(EU024133)            | 96              | <i>Proteobacteria</i><br>(Beta) | 583            |
| 147                                      |                          |                                    |                          |                                    | 2                        | CKW-16                             | <i>Acidovorax facilis</i> strain LMG 2193<br>(EU024133)            | 96              | <i>Proteobacteria</i><br>(Beta) | 583            |
| 148                                      |                          |                                    |                          |                                    | 3                        | CKW-17                             | <i>Acidovorax facilis</i> strain LMG 2193<br>(EU024133)            | 98              | <i>Proteobacteria</i><br>(Beta) | 582            |
| 149                                      |                          |                                    |                          |                                    | 2                        | CKW-18                             | <i>Aquaspirillum delicatum</i> strain<br>LMG 4328 (AF078756)       | 98              | <i>Proteobacteria</i><br>(Beta) | 550            |
| 150                                      |                          |                                    |                          |                                    | 6                        | CKW-19                             | <i>Tetrasphaera vanveenii</i> strain Ben<br>70 (DQ007320)          | 91              | <i>Actinobacteria</i>           | 570            |
| 151                                      |                          |                                    |                          |                                    | 3                        | CKW-20                             | <i>Cetobacterium somerae</i> strain<br>WAL 14325 (AJ438155)        | 99              | <i>Fusobacteria</i>             | 593            |
| 152                                      |                          |                                    |                          |                                    | 6                        | CKW-29                             | <i>Arcocella aquatica</i> strain NO-502 <sup>T</sup><br>(AJ535729) | 90              | <i>Bacteroidetes</i>            | 501            |
| 153                                      |                          |                                    |                          |                                    | 3                        | CKW-30                             | <i>Emticicia oligotropha</i> strain<br>GPTSA100-15 (AY904352)      | 97              | <i>Bacteroidetes</i>            | 583            |
| 154                                      |                          |                                    |                          |                                    | 1                        | CKW-31                             | <i>Emticicia oligotropha</i> strain<br>GPTSA100-15 (AY904352)      | 98              | <i>Bacteroidetes</i>            | 602            |

Supplementary Table S1. (continued)

| Clone-<br>phylogroup<br>No. <sup>a</sup> | Reed                     |                                    | Japanese loosestrife     |                                    | Pond water               |                                    | Authentic species<br>(Accession No.)                                   | Identity<br>(%) | Phylum<br>(Class)                | Length<br>(bp) |
|------------------------------------------|--------------------------|------------------------------------|--------------------------|------------------------------------|--------------------------|------------------------------------|------------------------------------------------------------------------|-----------------|----------------------------------|----------------|
|                                          | Total<br>no. of<br>clone | Name of<br>representative<br>clone | Total<br>no. of<br>clone | Name of<br>representative<br>clone | Total<br>no. of<br>clone | Name of<br>representative<br>clone |                                                                        |                 |                                  |                |
| 155                                      |                          |                                    |                          |                                    | 1                        | CKW-35                             | <i>Aquaspirillum delicatum</i> strain<br>LMG 4328 (AF078756)           | 98              | <i>Proteobacteria</i><br>(Beta)  | 602            |
| <u>156</u>                               |                          |                                    |                          |                                    | 1                        | CKW-38                             | <i>Owenweeksia hongkongensis</i> strain<br>UST20020801 (AB125062)      | 89              | <i>Bacteroidetes</i>             | 590            |
| <u>157</u>                               |                          |                                    |                          |                                    | 1                        | CKW-46                             | <i>Flexibacter canadensis</i> strain IFO<br>15130 (AB078046)           | 86              | <i>Bacteroidetes</i>             | 456            |
| <u>158</u>                               |                          |                                    |                          |                                    | 1                        | CKW-47                             | <i>Legionella taurinensis</i> strain ATCC<br>700508 (DQ667196)         | 93              | <i>Proteobacteria</i><br>(Gamma) | 480            |
| 159                                      |                          |                                    |                          |                                    | 1                        | CKW-59                             | <i>Emticicia oligotropha</i> strain<br>GPTSA100-15 (AY904352)          | 97              | <i>Bacteroidetes</i>             | 580            |
| <u>160</u>                               |                          |                                    |                          |                                    | 1                        | CKW-60                             | <i>Limnobacter thiooxidans</i> strain<br>CS-K2 (AJ289885)              | 94              | <i>Proteobacteria</i><br>(Beta)  | 521            |
| <u>161</u>                               |                          |                                    |                          |                                    | 1                        | CKW-62                             | <i>Methylophilus methylotrophus</i><br>strain NCIMB 10515 (AB193724)   | 95              | <i>Proteobacteria</i><br>(Beta)  | 627            |
| <u>162</u>                               |                          |                                    |                          |                                    | 1                        | CKW-71                             | <i>Niastella jeongjuensis</i> strain<br>GR20-13 (DQ244076)             | 93              | <i>Bacteroidetes</i>             | 572            |
| 163                                      |                          |                                    |                          |                                    | 1                        | CKW-72                             | <i>Acidovorax konjaci</i> strain ICMP<br>7733 (AF137507)               | 98              | <i>Proteobacteria</i><br>(Beta)  | 562            |
| <u>164</u>                               |                          |                                    |                          |                                    | 1                        | CKW-75                             | <i>Fluviicola taffensis</i> strain RW262<br>(AF493694)                 | 92              | <i>Bacteroidetes</i>             | 572            |
| <u>165</u>                               |                          |                                    |                          |                                    | 1                        | CKW-76                             | <i>Fluviicola taffensis</i> strain RW262<br>(AF493694)                 | 93              | <i>Bacteroidetes</i>             | 558            |
| 166                                      |                          |                                    |                          |                                    | 1                        | CKW-77                             | <i>Rhodoferax ferrireducens</i> strain<br>T118 <sup>1</sup> (CP000267) | 98              | <i>Proteobacteria</i><br>(Beta)  | 538            |
| 167                                      |                          |                                    |                          |                                    | 1                        | CKW-82                             | <i>Aquaspirillum delicatum</i> strain<br>LMG 4328 (AF078756)           | 96              | <i>Proteobacteria</i><br>(Beta)  | 522            |
| <u>168</u>                               |                          |                                    |                          |                                    | 1                        | CKW-83                             | <i>Cytophaga fermentans</i> strain ATCC<br>19072 (M58766)              | 87              | <i>Bacteroidetes</i>             | 602            |
| Total                                    | 85                       |                                    | 85                       |                                    | 85                       |                                    |                                                                        |                 |                                  |                |
| Novel<br>microbes <sup>b</sup>           | 50<br>(40)               |                                    | 65<br>(57)               |                                    | 34<br>(16)               |                                    |                                                                        |                 |                                  |                |

<sup>a</sup> The clonal phylotypes whose sequences indicated less than 95% identity with those from authentic species are underlined.

<sup>b</sup> The number of phylotypes showing phylogenetic novelty was provided in parentheses.
